# Supplementary material for: Directed synthesis of {CuII2ZnII2} and {CuII8ZnII8} heterometallic complexes
Source: Royal Society of Chemistry journal article supplement (doi:10.1039/c5dt03344f), 2015-01-01
Supplement: c5dt03344f1.pdf [file c5dt03344f1.pdf]

## Supporting Information

### Directed synthesis of $\{\text{Cu}^{\text{II}}_2\text{Zn}^{\text{II}}_2\}$ and $\{\text{Cu}^{\text{II}}_8\text{Zn}^{\text{II}}_8\}$ heterometallic complexes

María José Heras Ojea,<sup>a</sup> Claire Wilson,<sup>a</sup> Simon. J. Coles,<sup>b</sup> Floriana Tuna<sup>c</sup> and Mark Murrie<sup>a\*</sup>

<sup>a</sup>*WestCHEM, School of Chemistry, University of Glasgow, University Avenue, Glasgow G12 8QQ, U.K.*

<sup>b</sup>*Department of Chemistry, University of Southampton, Southampton SO17 1BJ, U.K.*

<sup>c</sup>*School of Chemistry and Photon Science Institute, University of Manchester, Oxford Road, Manchester, M13 9PL, U.K.*

[mark.murrie@glasgow.ac.uk](mailto:mark.murrie@glasgow.ac.uk)

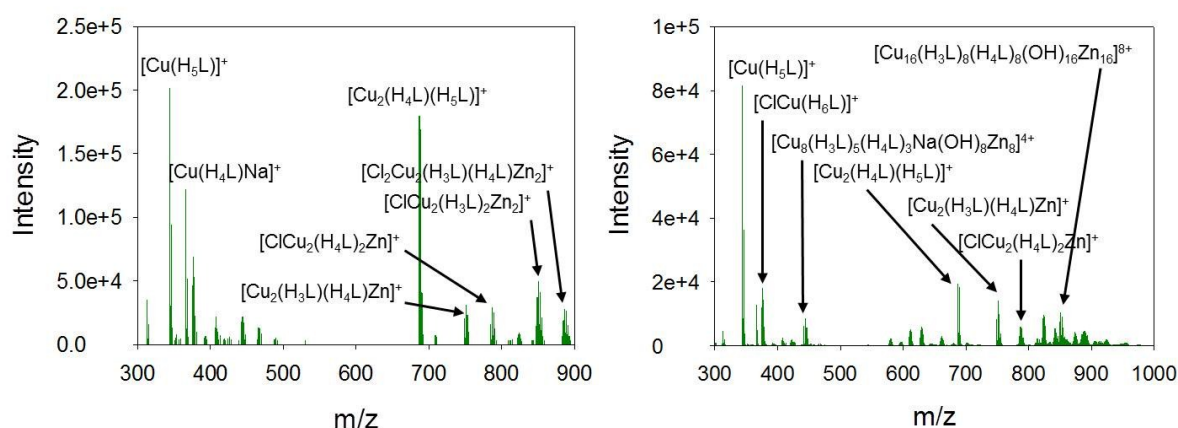

**Figure S1.** ESI<sup>+</sup> mass spectra for **1** (right) and **2** (left).

The majority of the peaks have been assigned considering the molecular weight and charge of the potential cations which could be present following fragmentation, and according to the tendency of H<sub>6</sub>L to display a certain arrangement around the different metal ions. Both spectra for complexes **1** and **2** show common peaks related to a metallo-organic monomeric species ([Cu(H<sub>5</sub>L)]<sup>+</sup>) and other polynuclear complex cations containing various Cu(II) and/or Zn(II) ions ([Cu<sub>2</sub>(H<sub>4</sub>L)(H<sub>5</sub>L)]<sup>+</sup>, [Cu<sub>2</sub>(H<sub>3</sub>L)(H<sub>4</sub>L)Zn]<sup>+</sup>, [ClCu<sub>2</sub>(H<sub>4</sub>L)<sub>2</sub>Zn]<sup>+</sup>). Taking into account the fragmentation observed in both spectra, the central chloride in **2** could act as template to form the {Cu<sub>8</sub>Zn<sub>8</sub>} ring, although assignment of the species is complicated by the presence of overlapping peaks. For **2**, the peaks observed in the region of m/z = 800-900 suggest a possible rearrangement of the {Cu<sub>8</sub>Zn<sub>8</sub>} units to form a larger Cu(II)/Zn(II) complex.

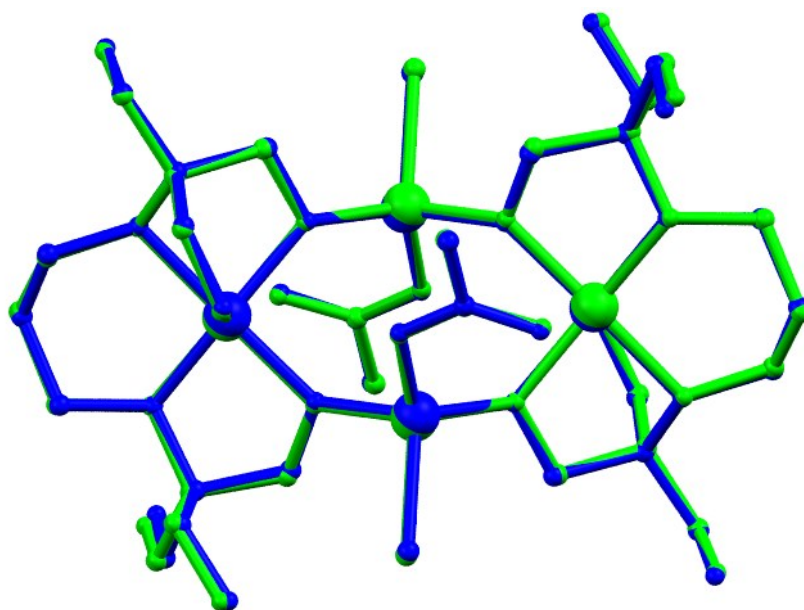

**Figure S2.** Overlay of the inequivalent molecules in the asymmetric unit of **1**.

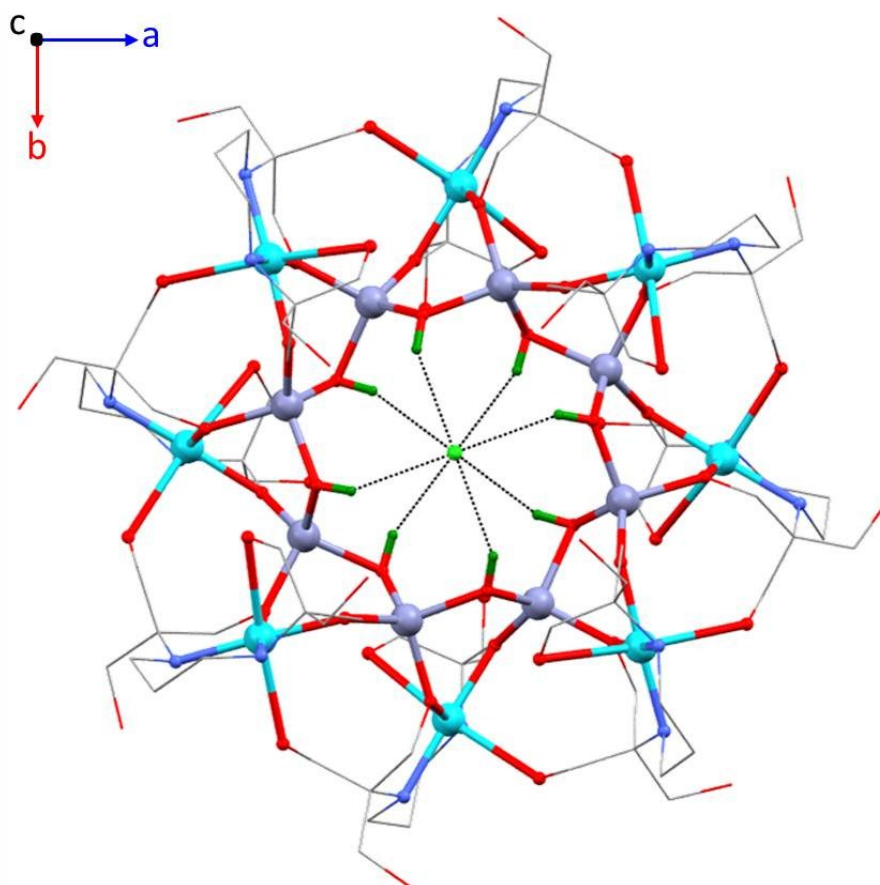

**Figure S3.** Intramolecular hydrogen bonding interactions in complex **2**. The hydrogen bonds between the central  $\text{Cl} \cdots \text{H}(\text{OH})$  are shown as dashed black lines. C, grey; Cl, green; Cu, turquoise; hydroxyl H atoms highlighted in dark green; N, blue; O, red; Zn, lavender.

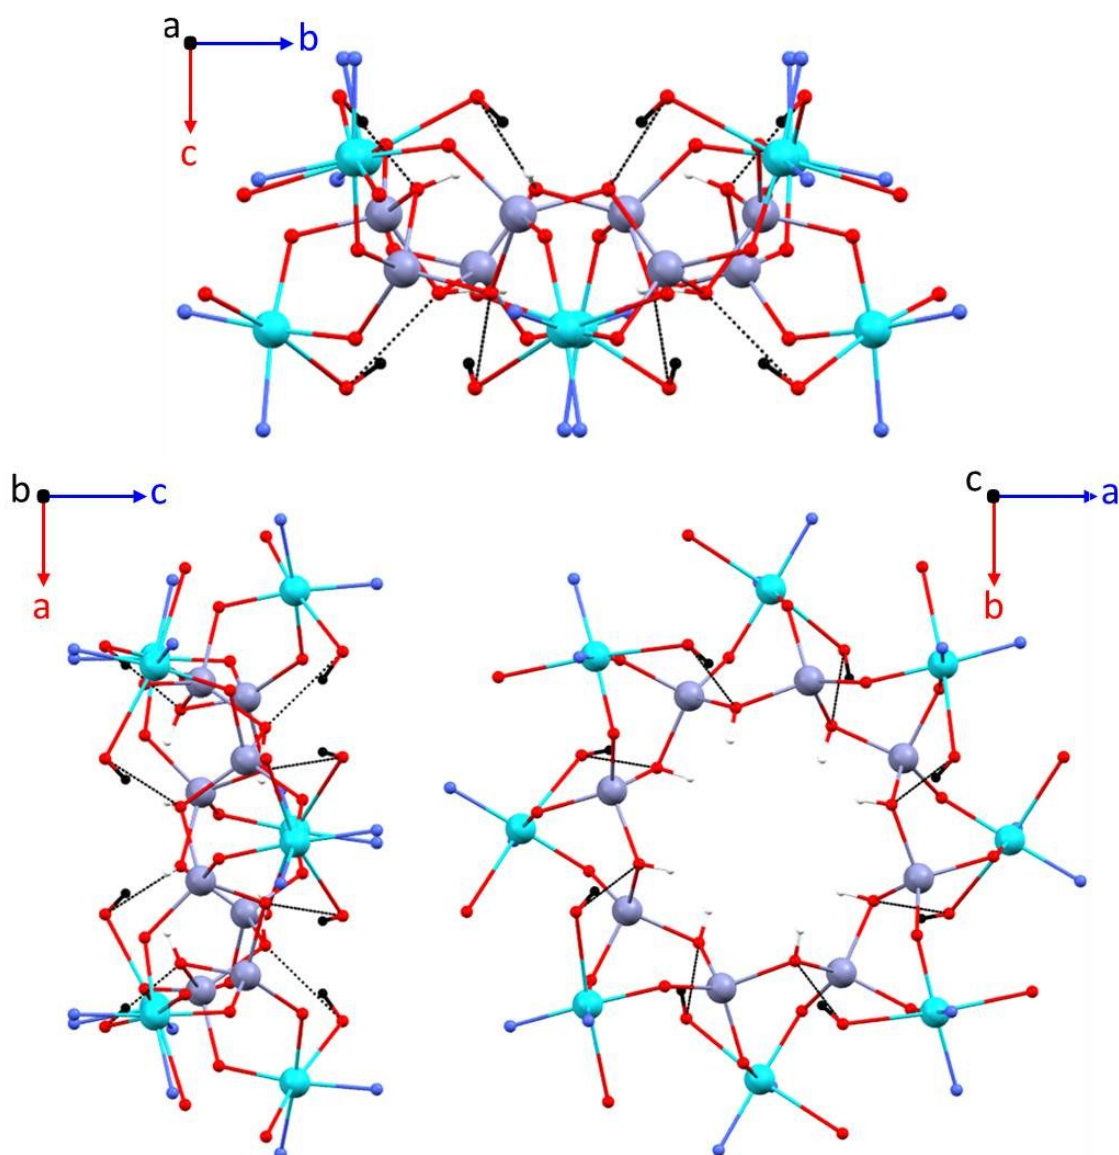

**Figure S4.** Intramolecular hydrogen bonding interactions in complex **2**. The hydrogen bonds between O(OH)···H(H<sub>4</sub>L<sup>2-</sup>) are shown as dashed black lines. C, grey; Cl, green; Cu, turquoise; hydroxyl H atoms highlighted in black; N, blue; O, red; Zn, lavender.

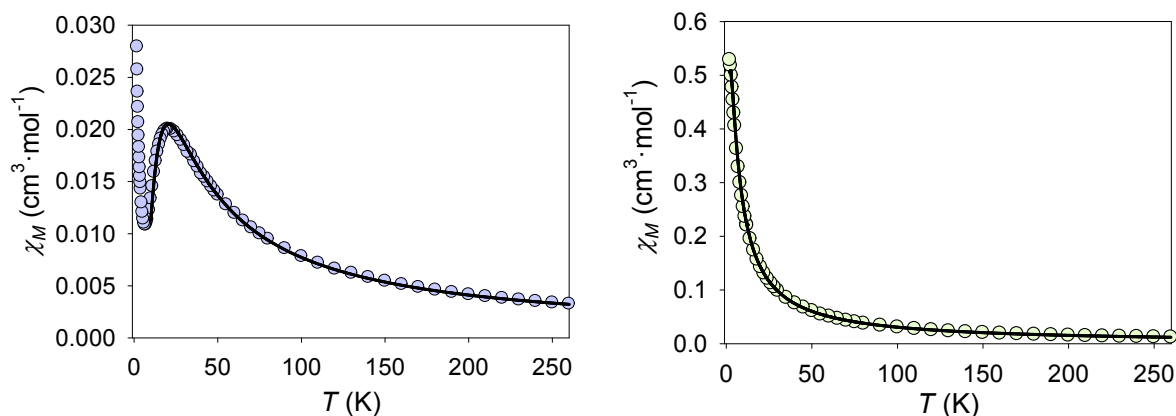

**Figure S5.** Molar magnetic susceptibility ( $\chi_M$ ) vs. temperature ( $T$ ) of **1** (left) and **2** (right) in an applied field of 10000 (**1**) and 5000 (**2**) Oe. The black lines correspond to the fit.

$$H = -2J\vec{s}_1 \cdot \vec{s}_2 + g\mu_B H \sum_{i=1}^2 \vec{s}_i \quad \text{Equation S1}$$

$$H = -2J \left[ \sum_{i=1}^7 \vec{s}_i \cdot \vec{s}_{i+1} + \vec{s}_8 \cdot \vec{s}_1 \right] + g\mu_B H \sum_{i=1}^8 \vec{s}_i \quad \text{Equation S2}$$

Spin Hamiltonians used to fit the magnetic data for complexes **1** and **2**, respectively, with a single parameter  $J$  describing the exchange interaction between Cu(II) centres ( $\vec{s}$  denotes the spin operator). The second term is the Zeeman interaction, with  $g$  the isotropic single-ion  $g$  factor,  $\mu_B$  the Bohr magneton and  $H$  the magnetic field.

The sharp increase of the  $\chi_M$  value at low temperatures in the  $\chi_M$  vs.  $T$  plot for **1** indicates the presence of a small paramagnetic impurity commonly observed in this kind of system, and is in accord with the value obtained from the fit.<sup>1, 2</sup>

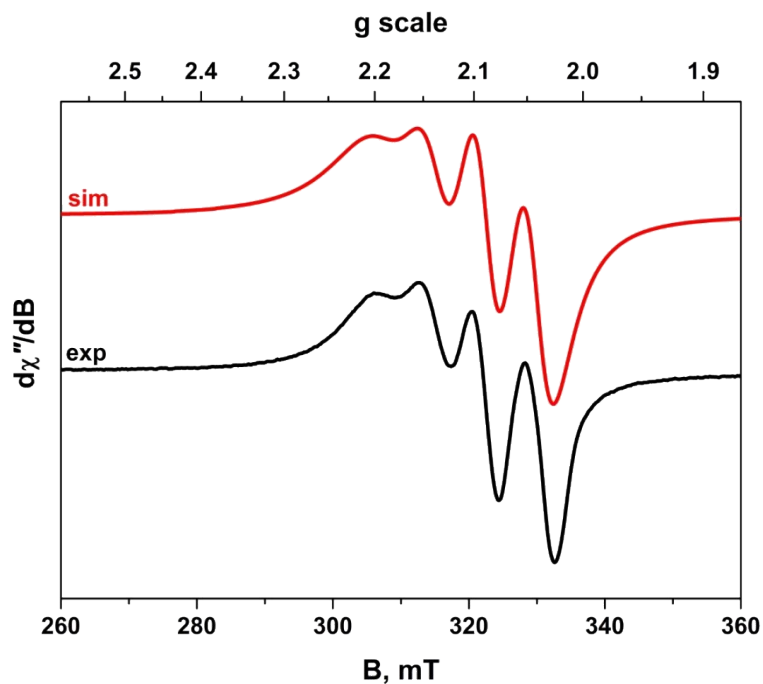

**Figure S6** X-band EPR spectrum of **1** recorded in MeOH solution at 293 K (experimental conditions: frequency, 9.4269 GHz; power, 20 mW; modulation, 0.3 mT). Experimental data are represented by the black line; simulation is depicted by the red trace.

$$g_{\text{iso}} = 2.109$$

$$A_{\text{iso}}\{^{63,65}\text{Cu}\} = 69 \times 10^{-4} \text{ cm}^{-1}$$

Although complex **1** appears to decompose in MeOH, we assume that the  $g_{\text{iso}}$  value of the resultant Cu bis-tris propane monomeric unit should be approximately the same as the  $g_{\text{iso}}$  value for **1**.

**Table S1.** Selected structural parameters and coordination environments of complexes **1**, **2** and  $\{\text{Cu}_2\text{Zn}_2(\text{DEA})_4\}^3$ .

| Complex                                                    | <b>1</b>  | <b>2</b>  | $\{\text{Cu}_2\text{Zn}_2(\text{DEA})_4\}^3$ |
|------------------------------------------------------------|-----------|-----------|----------------------------------------------|
| Geometry of Cu(II)                                         | $C_{4v}$  | $D_{4h}$  | $D_{4h}$                                     |
| $d_{(\text{Cu}\cdots\text{Cu}_a)}$ (Å)                     | 5.724(3)  | 5.685(2)  | 5.706(9)                                     |
| $d_{(\text{Cu}\cdots\text{Zn})}$ (Å)                       | 3.434(4)  | 3.389(2)  | 3.435(7)                                     |
| $\alpha_{(\text{Cu}\cdots\text{Zn}\cdots\text{Cu}_a)}$ (°) | 115       | 88.6      | 112.4                                        |
| $\beta_{(\text{CuOZn})}$ (°)                               | 124.58(7) | 122.52(4) | 123.69(1)                                    |

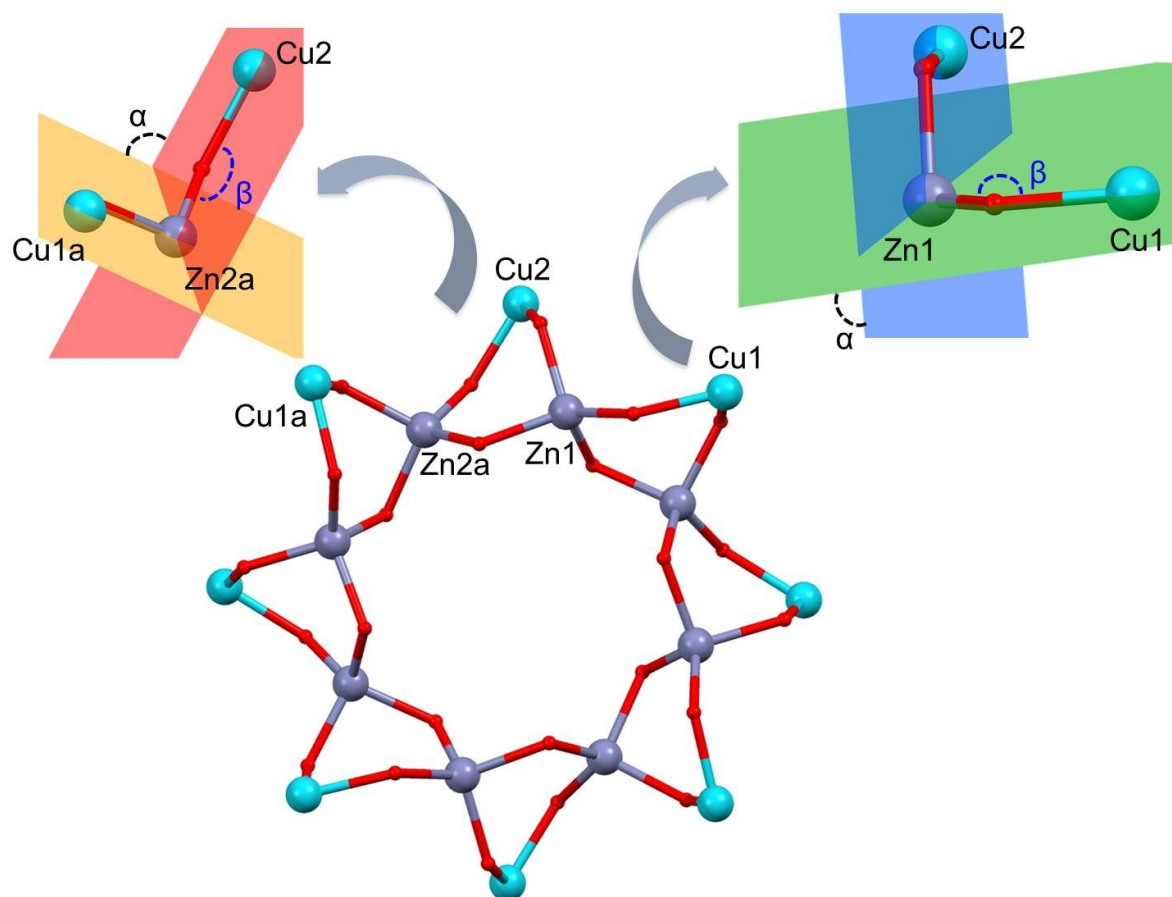

**Figure S7.** Detail of the crystal structure of **2**. Cu, turquoise; O, red; Zn, lavender.

## References

1. O. Kahn, *Angew. Chem. Int. Ed.*, 1985, 24, 834.
2. O. Kahn, in *Advances in Inorganic Chemistry*, ed. A. G. Sykes, Academic Press, 1995, vol. 43, pp. 179.
3. E. A. Buvaylo, V. N. Kokozay, O. Y. Vassilyeva, B. W. Skelton, J. Jezierska, L. C. Brunel and A. Ozarowski, *Chem. Commun.*, 2005, 4976.
